# Supplementary material
Source: PubMed Central journal article supplement (PMC1855666)
Supplement: aem_73_7_2085__1.pdf [file aem_73_7_2085__1.pdf]

Figure S1 (Traag et al.)

A. 100% conservation

|            |   |                                           |                                    |
|------------|---|-------------------------------------------|------------------------------------|
| SsgA_Sgold | 1 | -----MSFLVS-----EELSFR                    | PVELRYETC-DPYAVRLTFHLP---GDAPVTW   |
| SsgA_Sscab | 1 | -----MSFLVS-----EELSFR                    | PVELRYETC-DPYAVRLTFHLP---GDAPVTW   |
| SsgA_Saver | 1 | -----MSFLVS-----EELSFR                    | PVELRYETC-DPFAVQLTFHLP---GDAPVTW   |
| SsgA_Scoel | 1 | -----MSFLVS-----EELSFR                    | PVELRYETR-DPYAVRLTFHLP---GDAPVTW   |
| SsgA_Snetr | 1 | -----MRESVQAEVLSFLVS-----EELSFK           | PVELRYETR-DPYAVRMTFHLPL---GDAPVTW  |
| SsgA_Sgris | 1 | -----MSFLVS-----EELSFR                    | PVELRYEVEG-DPYAVRMTFHLPL---GDAPVTW |
| SsgA_Salbu | 1 | -----MSFLVS-----EELAFR                    | PVELRYETV-DPYAVRLTFHLP---GDAPVTW   |
| SsgB_Scoel | 1 | -----MNTTVSCELHLRLVVS-----SESSLP          | PAGLRYDTA-DPYAVHATFHTG---AEETVEW   |
| SsgB_Sscab | 1 | -----MNTTVSCELHLRLVVS-----SESSLP          | PAGLRYDTA-DPYAVHATFHTG---AEETVEW   |
| SsgB_Saver | 1 | -----MNTTVSCELHLRLVVS-----SESSLP          | PAGLRYDTA-DPYAVHATFHTG---AEETVEW   |
| SsgG_Scoel | 1 | ----MHTNPTGPTVVERELELRLVLS-----PESGIP     | PARLGYHTD-DPYAVHITFHID---SGHPVHW   |
| SsgG_Sscab | 1 | ----MRHTVVERELELGLVLS-----PEHTLP          | PAKLGERSD-DPYAVHITFHIN---SDRPVHW   |
| SsgY_Saver | 1 | -----MQLVVP-----HEISAP                    | SMRLRYEPS-DPYVVRAAFTAVD---SDETVEW  |
| SsgZ_Saver | 1 | -----MESLKTVMQEVAVQLVVS-----RTYSL         | CMSLRYEPT-DPYVVRATFFTH---TDEPTEW   |
| SsgD_Scoel | 1 | -----MSTVIEQVPEARLVAA-----APRMPS          | PATLHYDRA-DPFAVRMTFPAPATLEGVEVCW   |
| SsgD_Saver | 1 | -----MSTVIEQVPEARLVAA-----APRMPS          | PATLHYDRS-DPFAVRMTFPAPATLEGVEVCW   |
| SsgD_Sscab | 1 | -----LSTVIEQVPEARLVAA-----APRMPS          | PATLHYDRS-DPFAVRMTFPAPATLEGVEVCW   |
| SsgE_Saver | 1 | -----MSVVEQYARAHVVSD-----APEAQDT          | PVVLRYDPEVDPDRSVRIGLPG-----PHEW    |
| SsgE_Sscab | 1 | -----MSVVEQYARAHVVSD-----TPDDRDT          | PVVLRYDPDNDASAVRVLPG-----PDEW      |
| SsgE_Scoel | 1 | -----MSVVEQYARAHLLTDGDLDPQDDGGA           | PVVLRYDQLDPSKVCVALPGRGGRASGSEW     |
| SsgV_Sscab | 1 | -----MTVTLEQPARALLVTA-----EDREVP          | PASLRYRSD-DPLAVHLDFFADISLNGTMVTV   |
| SsgW_Sscab | 1 | -----MHPAQPTMPTPPALEQARARCLITP-----AYEEVP | RTTLRYTDP-DPLAVHLDFFAGVSAGDSVTV    |
| SsgF_Scoel | 1 | MSGDHHGVQAQHSAAQALLPLSLCLSQMTG-ALEWED     | PAEFRYDPD-HPLLVTIRFAPEG---APPVTW   |
| SsgC_Scoel | 1 | -----MNTVVHKTLVVQLQAG-----GTADRFP         | LAHLAYDAA-DPFAVTVVFSHDG---RVLARW   |
| consensus  | 1 |                                           | i y v w                            |

|            |    |                    |        |              |                   |          |         |      |        |      |
|------------|----|--------------------|--------|--------------|-------------------|----------|---------|------|--------|------|
| SsgA_Sgold | 42 | AFGRELLIDCGPRPCGD  | CDVHIA | PADPETFGEVL  | IRLQV----         | GSDQAM   | FRVGTAP | VAFT | DRD    | DKIV |
| SsgA_Sscab | 42 | AFGRELLIDCGVGRPCGD | CDVHIA | PADPETFGEVL  | IRLQV----         | GTDQAM   | FRVGTAP | VAFT | DRD    | DKIV |
| SsgA_Saver | 42 | TFGRELLIDCGVGRPCGD | CDVHIA | PADREAFGEVL  | IRLQV----         | GGDHAI   | FRSGAVP | VTF  | DRD    | DKIV |
| SsgA_Scoel | 42 | AFGRELLVDCVGRPCGD  | CDVRI  | APVEPEPLAEVL | IRLQV----         | GSDQAM   | FRSSAAP | VAFT | DRD    | DKIV |
| SsgA_Snetr | 52 | AFGRELLLDGINRPSGD  | CDVHIA | APTDEGLSDVS  | IRLQV----         | GADRAI   | FRAGAPP | VAFT | DRD    | DKSV |
| SsgA_Sgris | 42 | AFGRELLLDGLNSPSGD  | CDVHIA | GTEPEGLGDVH  | IRLQV----         | GADRAI   | FRAGTAP | VAFT | DRD    | DKIV |
| SsgA_Salbu | 42 | VFGRELLVECVLDAAGD  | CDVRI  | CPVQGTATREVH | ITLQV----         | GSEQAM   | FRVGKAP | LAFT | DRD    | DQGL |
| SsgB_Scoel | 52 | VFARDLLAECGLHRPTGT | CDVRI  | WPSRSHGQGVV  | CHALSS----        | PEGEAL   | LEAPARA | ESFT | KRT    | DAAV |
| SsgB_Sscab | 52 | VFARDLLAECGLHRPTGT | CDVRI  | WPSRSHGQGVV  | CHALSS----        | PEGEAL   | LEAPARA | ESFT | KRT    | DAAV |
| SsgB_Saver | 52 | VFARDLLAECGLHRPTGT | CDVRI  | WPSRSHGQGVV  | CHALSS----        | PEGEAL   | LEAPARA | ESFT | KRT    | DAAV |
| SsgG_Scoel | 58 | TFARDLLVECVFRPSGH  | CDVRI  | WPSKTEGRSVV  | VALSS----         | PDGDAL   | LEAPTPO | SAWL | ERT    | LRAV |
| SsgG_Sscab | 53 | TFARELLVECVFRPCGQ  | CDVRI  | WPTKVSGRGVV  | VALSS----         | PDGDAL   | LEAPAAA | SAWL | ERT    | LRVV |
| SsgY_Saver | 43 | IIGRDLLIDCLEGSPVGE | CDIS   | WPADGPRSDSY  | ILLNP----         | PAGTAL   | LKARTHE | KTFT | QGT    | EDLV |
| SsgZ_Saver | 54 | VLGRDLLADCLRGSAGC  | CDIR   | WPAVGRGDKAMY | IVLGA----         | PAGTAL   | LEVVPQD | KTFT | ESAE   | EALV |
| SsgD_Scoel | 55 | TFSRELLIACMQEPNGH  | CDVRI  | RP---YAYDRTV | EFHA----          | PEGTAV   | IHVRSGE | RRFL | QAAG   | EELV |
| SsgD_Saver | 55 | TFARELLASGMEEPVGH  | CDVRI  | RP---YGYDRTV | EFHA----          | PEGTAV   | VHVRSGE | RRFL | ERT    | TEL  |
| SsgD_Sscab | 55 | TFARELLVTGMEESVGH  | CDVRI  | RP---YGYERLV | EFHA----          | PEGTAV   | VHVHAGE | RRFL | EGT    | IDLV |
| SsgE_Saver | 49 | AFSRDLLERCLRTPTGT  | CEVRI  | WP---CGRVQAV | MEFHS----         | AQGVAV   | VEFEAKT | FRFL | DRTY   | LAT  |
| SsgE_Sscab | 50 | TFPRELLERCLRTPTTS  | CEVSI  | WP---CGRVQAV | MEFHS----         | AQGVAV   | MQFDTKA | IRFL | DRTY   | YAT  |
| SsgE_Scoel | 60 | TFSRELLLEQLRAPAGS  | CEVRI  | WP---CGRVQAV | MEFHS----         | PQGCSV   | VQFENKA | IRFL | DRTY   | YAT  |
| SsgV_Sscab | 55 | TFSRELLLEKCVGAPSGN | CDVRI  | WP---CGRLRTV | VELHS----         | PYGTAL   | LRFEKAA | QRFL | DRSY   | GVV  |
| SsgW_Sscab | 64 | AFARALLAECILTASAGI | CDVRI  | WP---CGPAHTV | VELRS----         | PHGMAM   | IRFDTP  | RRFL | DRRS   | YAVV |
| SsgF_Scoel | 66 | HVGRDLLHECLRTTSGL  | CDVRI  | WADTPTDRETAV | IQVNA----         | HGDIAT   | FSLPVP  | EEW  | DRTY   | LHV  |
| SsgC_Scoel | 53 | TLDREMVAECLTRPVGV  | CDVRI  | RPESRGMWDEL  | RHELLGDGRADGERHRA | VVFVWAAV | WEAFT   | DR   | RETHAV |      |
| consensus  | 71 | R 11 G             | G v i  | i            | m                 | l        | f l     |      |        |      |

|            |     |                              |            |
|------------|-----|------------------------------|------------|
| SsgA_Sgold | 106 | PLGQERSLADFDALLDEALDR        | ILAEEQNASG |
| SsgA_Sscab | 106 | PLGQERSLADFDLLDEALDR         | ILAEEQNASG |
| SsgA_Saver | 106 | PLGQECSLADFD AHLDEALDR       | ILAEEQNASG |
| SsgA_Scoel | 106 | PLGQEGALADFD SHLDEALDR       | ILAEEQNASG |
| SsgA_Snetr | 116 | PLGQEQLTGDGFEDSLEAALGK       | ILAEEQNASG |
| SsgA_Sgris | 106 | PLGQEHTLGDGFDGNLEDALGR       | ILAEEQNASG |
| SsgA_Salbu | 106 | SLGSERAHADFD SHLDDALNRS      | LAEEQNASG  |
| SsgB_Scoel | 116 | PPGTEHRHFDDLDQELSHILAES      | -----      |
| SsgB_Sscab | 116 | PPGTEHRHFDDLDQELSHILAES      | -----      |
| SsgB_Saver | 116 | PPGTEHRHFDDLDTELSHILAES      | -----      |
| SsgG_Scoel | 122 | PPGTEGAQLGIDDGLAELLAR        | -----      |
| SsgG_Sscab | 117 | PPGSEFDMLGFDDGLAELLAR        | -----      |
| SsgY_Saver | 107 | PRGAEPGHIDLDTSLAHFLAEG       | -----      |
| SsgZ_Saver | 118 | PRGTESGHIDWDREVANLFAKG       | -----      |
| SsgD_Scoel | 116 | PVGLEHLQLDLDHDLAELMRGSC      | -----      |
| SsgD_Saver | 116 | PVGLEHLQIDLDHDLAELMRDAC      | -----      |
| SsgD_Sscab | 116 | PLGLEHHVLDLDHDLAQLMRDAC      | -----      |
| SsgE_Saver | 110 | PVPH-----                    | -----      |
| SsgE_Sscab | 111 | PVAH-----                    | -----      |
| SsgE_Scoel | 121 | AQPVAH-----                  | -----      |
| SsgV_Sscab | 116 | PAGREELGPALDRGLTSLLRGV       | -----      |
| SsgW_Sscab | 125 | PLGGEGLGPAFDDGLASLLDGV       | -----      |
| SsgF_Scoel | 130 | PAGTESRRLGTD AFLSKLFDEPEASSR | ---        |
| SsgC_Scoel | 123 | RPGREE--VRVDDFLAELTAEG       | -----      |
| consensus  | 141 |                              |            |

**Figure S1 (contd.)**  
**B. 50% conservation**

```

SsgA_Sgold 1 -----MSFLVS-----EELSFRLPVELRYETC-DPYAVRLTFHLP---GDAPVTW
SsgA_Sscab 1 -----MSFLVS-----EELSFRLPVELRYETC-DPYAVRLTFHLP---GDAPVTW
SsgA_Saver 1 -----MSFLVS-----EELSFRLPVELRYETC-DPYAVRLTFHLP---GDAPVTW
SsgA_Scoel 1 -----MSFLVS-----EELSFRLPVELRYETR-DPYAVRLTFHLP---GDAPVTW
SsgA_Snetr 1 -----MRESVQAEVLSFLVS-----EELSFRLPVELRYETR-DPYAVRLTFHLP---GDAPVTW
SsgA_Sgris 1 -----MSFLVS-----EELSFRLPVELRYEYVG-DPYAVRLTFHLP---GDAPVTW
SsgA_Salbu 1 -----MSFLVS-----EELAFRLPVELRYETV-DPYAVRLTFHLP---GDAPVTW
SsgB_Scoel 1 -----MNTIVSCEHLRLVVS-----SESSLPVPAGLRYDTA-DPYAVHATFFHTG---AETVVEW
SsgB_Sscab 1 -----MNTIVSCEHLRLVVS-----SESSLPVPAGLRYDTA-DPYAVHATFFHTG---AETVVEW
SsgB_Saver 1 -----MNTIVSCEHLRLVVS-----SESSLPVPAGLRYDTA-DPYAVHATFFHTG---AETVVEW
SsgG_Scoel 1 ----MHTNPTGPTVVEREELRLVLS-----PEGIPVPEARLGYHID-DPYAVHATFFHID---SGHPVHW
SsgG_Sscab 1 ----MRHIVVEREELRLVLS-----PEHLPVPAKLGFRSD-DPYAVHATFFHIN---SDRPVHW
SsgY_Saver 1 -----YQLVVP-----HEISAPVSMRLRYEFS-DPYVVRAAFVAVD---SDETVEW
SsgZ_Saver 1 ----MESLKTVMQEVAVQLVVS-----RTYSLVCMSLRYEPT-DPYVVRATFFTH---TDETEW
SsgD_Scoel 1 ----MSIVLEQVPEARLVAA-----APRMPSPATLHYDRA-DPYAVRMTFPAPATLEGVEVWCW
SsgD_Saver 1 ----MSIVLEQVPEARLVAA-----APRMPSPATLHYDRS-DPYAVRMTFPAPATLEGVEVWCW
SsgD_Sscab 1 ----LSIVLEQVPEARLVAA-----APRMPSPATLHYDRS-DPYAVRMTFPAPATLEGVEVWCW
SsgE_Saver 1 ----MSVVEQYARAHVSD-----APEAQDTVPVVLRYDPEVDPRSVRGLPG-----EHEW
SsgE_Sscab 1 ----MSVVEQYARAHVSD-----TPDDRDTVPVVLRYDPEVDPRSVRGLPG-----EDEW
SsgE_Scoel 1 ----MSVVEQYARAHVSD-----TPDDRDTVPVVLRYDPEVDPRSVRGLPG-----EDEW
SsgV_Sscab 1 ----MTVILEQPARALLVTA-----EDREVPVHSLRYRSD-DPYAVHATFFPADISLNGTMTW
SsgW_Sscab 1 ----MHPAQPTMPTPALRQARACLITP-----AYEEVVRTTLRYTPD-DPYAVHATFFPAGVSAQVSVTW
SsgF_Scoel 1 MSGDHHGVQAQHSAAQALPLSLCLQSMGTG-ALEWEDVFAEFRYDPD-HPLLVTRFAPEG---APPVTW
SsgC_Scoel 1 ----MNTIVVHKTIVVQLQAG-----GTADRFPVLAHLAYDAA-DPYAVRLTFVSHDG---RVLARW
consensus 1 t v v m lvvs e s vpv lryet dpyavrltfh gd pv W

```

```

SsgA_Sgold 42 AFGRELLIDGGRPCGGDGDVHILAPADPETFGEVLIIRLQV-----GSDQAMFRVGTAPLVAFLDRTDKIV
SsgA_Sscab 42 AFGRELLIDGGRPCGGDGDVHILAPADPETFGEVLIIRLQV-----GTDQAMFRVGTAPLVAFLDRTDKIV
SsgA_Saver 42 TFGRELLIDGGRPCGGDGDVHILAPADREAFGEVLIIRLQV-----GGDHALFRSGAVPLVTFDRTDKIV
SsgA_Scoel 42 AFGRELLVDGGRPCGGDGDVHILAPVEPEPLAEVLIIRLQV-----GSDQALFRSSAAPLVAFLDRTDKIV
SsgA_Snetr 52 AFGRELLLDGINRPSGDDGDVHILAPTDPEGLSDVSIIRLQV-----GADRALFRAGAPLVAFLDRTDKIV
SsgA_Sgris 42 AFGRELLLDGLNSPSGDDGDVHILGTEPEGLGDVHILRQV-----GADRALFRAGTAPLVAFLDRTDKIV
SsgA_Salbu 42 VFGRELLVGVLDAAAGDGDVVRVCPVQGTATREVVHITLQV-----GSEQALFRVGKAPLVAFLDRTDQGL
SsgB_Scoel 52 VFARDLLAELHRRPTGTIGDVRVWPSRSHGQGVVCHALSS-----PEGEALLEAPARAESEFLKRTDAAV
SsgB_Sscab 52 VFARDLLAELHRRPTGTIGDVRVWPSRSHGQGVVCHALSS-----PEGEALLEAPARAESEFLKRTDAAV
SsgB_Saver 52 VFARDLLAELHRRPTGTIGDVRVWPSRSHGQGVVCHALSS-----PEGEALLEAPARAESEFLKRTDAAV
SsgG_Scoel 58 TFARDLLVEGFRPSCGHGDVRVWPSKTEGRSVVLMALSS-----PDGDALLEAPTQVSAWLERLTLRAV
SsgG_Sscab 53 TFARELLVEGFRPCGGDGDVRVWPTKVSGRGVLMALSS-----PDGDALLEAPAAAWSAWLERLTLRVV
SsgY_Saver 43 IIGRDLLIDGLEGVGEGDISLWADGPDPRSDSYILLNP-----PAGTALLKARTHEKTFIQGTEDLV
SsgZ_Saver 54 VLERDILLADGLRGSAGCGDIRVWPVAVGRGDKAVYIVLGA-----PAGTALLEVPVQDKTFLESAAHALV
SsgD_Scoel 55 TFSRELLIAGMQEENGHGDVVRVPE---YAYDRTVLEFHA-----PEGTAVVHVRSGEIRRFQAAAGELV
SsgD_Saver 55 TFARELLASGMEEPVGHGDVVRVPE---YGYDRTVLEFHA-----PEGTAVVHVRSGEIRRFLERTTELV
SsgE_Sscab 55 TFARELLVTGMEESVGHGDVVRVPE---YGYERLVLEFHA-----PEGTAVVHVRSGEIRRFLEGTIDLV
SsgE_Saver 49 AFSRDLLERGLRPTGTGCEVRVWPE---CGRVQAVMEFHS-----AQQVAVVEFEAKTFRFRRTTYLAT
SsgE_Sscab 50 TPRELLERGLRPTTSCPVSTWPE---CGRVQAVMEFHS-----AQQVAVMQFDTKALIRFRRTTYTAV
SsgE_Scoel 60 TFSRELLEQLRABAGSGEVRVWPE---CGRVQAVMEFHS-----PQGCVVQFENKALIRFRRTTYAAT
SsgV_Sscab 55 TFSRELLEKGVGAPSGNGDVHILWPE---CGRVQAVMEFHS-----PYGTALLRFEKAALQRFLLRSYGVV
SsgW_Sscab 64 AFARDLLAELGLTASAGIGDVHILWPE---CGPAHTVVELRS-----PHGMAMIRFDTPTRFRFRRSYAVV
SsgF_Scoel 66 HVGRDLLHEGLRSTTSGLDVQVWADTPTDRETAWLQVNA-----HGDIAIFSLPVPPEEHWDRTYLHV
SsgC_Scoel 53 TLDREMVVAGLTRVGVGDVVRVPEESRGMWDEIRTEELGSDGRADGERHRAVVFVWAAAVAEAFRETHAVV
consensus 71 fgRelidGl p g Gdvrvwp g vli l p g allr l fldrtd iv

```

```

SsgA_Sgold 106 PLGQERSLADFDALLDEALDRILAEEQNAG
SsgA_Sscab 106 PLGQERSLADFDTLDEALDRILAEEQSAG
SsgA_Saver 106 PLGQECSLADFDALHDEALDRILAEEQSAG
SsgA_Scoel 106 PLGQEGALADFDSHLDEALDRILAEEQSAG
SsgA_Snetr 116 PLGQEQLGDFEDSLEAALGKILAEEQNAG
SsgA_Sgris 106 PLGQEHTLGDFDGNLEDALGRILAEEQNAG
SsgA_Salbu 106 SLGSERAHADFDSHLDDALNRSLAEEQSAG
SsgB_Scoel 116 PPGTEHRRHFDLDQELSHLLAES-----
SsgB_Sscab 116 PPGTEHRRHFDLDQELSHLLAES-----
SsgB_Saver 116 PPGTEHRRHFDLDTELSHLLAES-----
SsgG_Scoel 122 PPGTEGAQLGIDDCGLAELLAR-----
SsgG_Sscab 117 PPGSEFDMLGFDDGLAELLAR-----
SsgY_Saver 107 PRGAEFGHIDLDTSLAHFLAEG-----
SsgZ_Saver 118 PRGTESGHIDWDREMANLFAKG-----
SsgD_Scoel 116 PVGLEHLQLDLDHDLAELMRGSC-----
SsgD_Saver 116 PVGLEHLQLDLDHDLAELMRDAC-----
SsgD_Sscab 116 PVGLEHHHVLDLDHDLAELMRDAC-----
SsgE_Saver 110 PVPH-----
SsgE_Sscab 111 PVAH-----
SsgE_Scoel 121 AQPVAH-----
SsgV_Sscab 116 PAGREELGPALDRGLTSLLRGV-----
SsgW_Sscab 125 PLGGEGLGPAFDGCLASLDGV-----
SsgF_Scoel 130 PAGTESSRLGTDALSKLFDEPEASSR---
SsgC_Scoel 123 RFGREE--VRVDDFLAELTAEG-----
consensus 141 plg e d d l il

```

**Figure S1. Alignment of SsgA-like proteins (SALPs).** Conserved residues are highlighted by black shading (complete conservation) or grey shading (includes so-called conserved changes, such as Arg or Lys). Figures represent 100% conservation (A) or 50% conservation among all SALPs analysed (B). Nomenclature is based on highest sequence homology to the *S. coelicolor* SALP homologues. Contigs refer to short sequence files extracted from the *S. scabies* database ([www.sanger.ac.uk/Projects/S\\_scabies](http://www.sanger.ac.uk/Projects/S_scabies)). The complete genome sequences of *S. avermitilis* (Ikeda *et al.*, 2003) and *S. coelicolor* (Bentley *et al.*, 2002) have been published. Proteins, abbreviations and accession numbers are presented in the Table below. Alignment was produced using the ClustalW algorithm and presentation produced using the BoxShade webserver (see Materials and Methods section).

| Short name | SALP | Organism of origin     | Database or contig number |
|------------|------|------------------------|---------------------------|
| SsgA_Scoel | SsgA | <i>S. coelicolor</i>   | SCO3926                   |
| SsgB_Scoel | SsgB | <i>S. coelicolor</i>   | SCO1541                   |
| SsgC_Scoel | SsgC | <i>S. coelicolor</i>   | SCO7289                   |
| SsgD_Scoel | SsgD | <i>S. coelicolor</i>   | SCO6722                   |
| SsgE_Scoel | SsgE | <i>S. coelicolor</i>   | SCO3158                   |
| SsgF_Scoel | SsgF | <i>S. coelicolor</i>   | SCO7175                   |
| SsgG_Scoel | SsgG | <i>S. coelicolor</i>   | SCO2924                   |
| SsgA_Saver | SsgA | <i>S. avermitilis</i>  | SAV4267                   |
| SsgB_Saver | SsgB | <i>S. avermitilis</i>  | SAV6810                   |
| SsgD_Saver | SsgD | <i>S. avermitilis</i>  | SAV1687                   |
| SsgE_Saver | SsgE | <i>S. avermitilis</i>  | SAV3605                   |
| SsgY_Saver | SsgY | <i>S. avermitilis</i>  | SAV570                    |
| SsgZ_Saver | SsgZ | <i>S. avermitilis</i>  | SAV580                    |
| SsgA_Sscab | SsgA | <i>S. scabies</i>      | contig: scab0274d04.q1k   |
| SsgB_Sscab | SsgB | <i>S. scabies</i>      | contig: scab0975f02.p1k   |
| SsgD_Sscab | SsgD | <i>S. scabies</i>      | contig: scab0372d01.q1k   |
| SsgE_Sscab | SsgE | <i>S. scabies</i>      | contig: scab0136f09.q1k   |
| SsgG_Sscab | SsgG | <i>S. scabies</i>      | contig: sab0313c04.q1k    |
| SsgV_Sscab | SsgV | <i>S. scabies</i>      | contig: scab0162c08.q1k   |
| SsgW_Sscab | SsgW | <i>S. scabies</i>      | contig: scab0039b09.q1k   |
| SsgA_Salbu | SsgA | <i>S. albus</i>        | AF195771                  |
| SsgA_Sgold | SsgA | <i>S. goldeniensis</i> | AF195773                  |
| SsgA_Sgris | SsgA | <i>S. griseus</i>      | BAA21558                  |
| SsgA_Snetr | SsgA | <i>S. netropsis</i>    | AF195772                  |
